# Supplementary material for: Tobacco Smoking and Gastric Cancer Risk: An Evaluation Based on a Systematic Review of Epidemiologic Evidence among the Japanese Population
Source: Oxford University Press journal article supplement (doi:10.1093/jjco/hyl112), 2006-12-01
Supplement: hyl112_Supplementary_Data.zip [file hyl112_Supplementary_Data.zip]

Archive with 1 entries (1 files):
- hyl112_SupplementData.pdf
