# Supplementary material for: Tobacco Smoking and Gastric Cancer Risk: An Evaluation Based on a Systematic Review of Epidemiologic Evidence among the Japanese Population
Source: Oxford University Press journal article supplement (doi:10.1093/jjco/hyl112), 2006-12-01
Supplement: hyl112_Supplementary_Data.zip [file hyl112_Supplementary_Data.zip › hyl112_SupplementData.pdf]

**Table 1.** Tobacco smoking and gastric cancer risk, cohort study in Japanese population

| Reference              | Study period | Study population                |                                                                                 |                |                                    | Category                     | Number among cases | Relative risk (95% CI or <i>P</i> ) | <i>P</i> for trend | Confounding variables considered | Comments |
|------------------------|--------------|---------------------------------|---------------------------------------------------------------------------------|----------------|------------------------------------|------------------------------|--------------------|-------------------------------------|--------------------|----------------------------------|----------|
|                        |              | Number of subjects for analysis | Source of subjects                                                              | Event followed | Number of incident cases or deaths |                              |                    |                                     |                    |                                  |          |
| Kono et al. (1987) (6) | 1965–1983    | 5130 men                        | Male physicians in western Japan                                                | Death          | 116 men                            | Never/Past                   |                    | 1.00                                |                    | Age, drinking habit              |          |
|                        |              | 27–89 years old                 |                                                                                 |                |                                    | Current 1–19 cigarettes /day |                    | 1.66 (1.07–2.59)                    |                    |                                  |          |
|                        |              | Mean 49 years old               |                                                                                 |                |                                    | ≥20                          |                    | 1.79 (1.09–2.96)                    |                    |                                  |          |
| Hirayama (1990) (7)    | 1966–1982    | 122 261 men                     | 95% of the census population in 29 health center-covered areas in 6 prefectures | Death          | 3414 men                           | Men                          |                    |                                     |                    | Age                              | 90% CI   |
|                        |              | 142 857 women                   |                                                                                 |                | 1833 women                         | Non-smoker                   |                    | 1.00                                |                    |                                  |          |
|                        |              | ≥40 years old                   |                                                                                 |                |                                    | Daily smoker                 |                    | 1.45 (1.33–1.57)                    |                    |                                  |          |
|                        |              |                                 |                                                                                 |                |                                    | 1–9 cigarettes/day           |                    | 1.45 (1.28–1.64)                    |                    |                                  |          |
|                        |              |                                 |                                                                                 |                |                                    | 10–19                        |                    | 1.41 (1.29–1.54)                    |                    |                                  |          |
|                        |              |                                 |                                                                                 |                |                                    | ≥20                          |                    | 1.49 (1.36–1.63)                    |                    |                                  |          |
|                        |              |                                 |                                                                                 |                |                                    | Start ≤19 years old          |                    | 1.60 (1.42–1.81)                    |                    |                                  |          |
|                        |              |                                 |                                                                                 |                |                                    | ≥20                          |                    | 1.39 (1.27–1.51)                    |                    |                                  |          |
|                        |              |                                 |                                                                                 |                |                                    | 1–4 years after cessation    |                    | 1.54 (1.21–1.95)                    |                    |                                  |          |
|                        |              |                                 |                                                                                 |                |                                    | 5–9                          |                    | 1.59 (1.18–2.13)                    |                    |                                  |          |
|                        |              |                                 |                                                                                 |                |                                    | ≥10                          |                    | 0.87 (0.61–1.24)                    |                    |                                  |          |
|                        |              |                                 |                                                                                 |                |                                    | Women                        |                    |                                     |                    |                                  |          |
|                        |              |                                 |                                                                                 |                |                                    | Non-smoker                   |                    | 1.00                                |                    |                                  |          |
|                        |              |                                 |                                                                                 |                |                                    | Daily smoker                 |                    | 1.18 (1.05–1.33)                    |                    |                                  |          |
|                        |              |                                 |                                                                                 |                |                                    | 1–9 cigarettes/day           |                    | 1.26 (1.06–1.48)                    |                    |                                  |          |
|                        |              |                                 |                                                                                 |                |                                    | 10–19                        |                    | 1.11 (0.91–1.34)                    |                    |                                  |          |
|                        |              |                                 |                                                                                 |                |                                    | ≥20                          |                    | 0.76 (0.46–1.26)                    |                    |                                  |          |
|                        |              |                                 |                                                                                 |                |                                    | Start ≤ 19 years old         |                    | 1.25 (0.66–2.39)                    |                    |                                  |          |
|                        |              |                                 |                                                                                 |                |                                    | ≥20                          |                    | 1.16 (1.02–1.33)                    |                    |                                  |          |
|                        |              |                                 |                                                                                 |                |                                    | 1–4 years after cessation    |                    | 1.42 (0.63–3.22)                    |                    |                                  |          |
|                        |              |                                 |                                                                                 |                |                                    | 5–9                          |                    | 1.82 (0.68–4.87)                    |                    |                                  |          |
|                        |              |                                 |                                                                                 |                |                                    | ≥10                          |                    | 1.40 (0.45–4.34)                    |                    |                                  |          |

*Continued*

Table 1. Continued

| Reference                | Study period                                                              | Study population                                          |                                                                  |                |                                    | Category                     | Number among cases | Relative risk (95% CI or <i>P</i> ) | <i>P</i> for trend | Confounding variables considered                                            | Comments |
|--------------------------|---------------------------------------------------------------------------|-----------------------------------------------------------|------------------------------------------------------------------|----------------|------------------------------------|------------------------------|--------------------|-------------------------------------|--------------------|-----------------------------------------------------------------------------|----------|
|                          |                                                                           | Number of subjects for analysis                           | Source of subjects                                               | Event followed | Number of incident cases or deaths |                              |                    |                                     |                    |                                                                             |          |
| Kato et al. (1992) (8)   | 1985–1989 (questionnaire survey)<br><br>4.4 years of follow-up on average | 3914 subjects (1851 men and 2063 women)                   | Patients who underwent endoscopy at Aichi Cancer Center Hospital | Incidence      | 45 cases (35 men and 10 women)     | Never                        | 15                 | 1.00                                |                    | Age, sex, residence                                                         |          |
|                          |                                                                           |                                                           |                                                                  |                |                                    | Past                         | 11                 | 1.17 (0.47–2.94)                    |                    |                                                                             |          |
|                          |                                                                           |                                                           |                                                                  |                |                                    | Current 1–19 cigarettes /day | 5                  | 1.08 (0.36–3.26)                    |                    |                                                                             |          |
|                          |                                                                           |                                                           |                                                                  |                |                                    | ≥20                          | 14                 | 2.24 (0.92–5.44)                    |                    |                                                                             |          |
| Kato et al. (1992) (9)   | 1985–1991                                                                 | 9753 subjects<br>men ≥40 years old<br>women ≥30 years old | inhabitants of Higashi–kamo county in Aichi                      | Death          | 35 men<br>22 women                 | Men and women                |                    |                                     |                    | Age, sex, alcohol intake, cooking methods, family history of stomach cancer |          |
|                          |                                                                           |                                                           |                                                                  |                |                                    | Never                        | 26                 | 1.00                                |                    |                                                                             |          |
|                          |                                                                           |                                                           |                                                                  |                |                                    | Past                         | 6                  | 2.62 (0.97–7.05)                    |                    |                                                                             |          |
|                          |                                                                           |                                                           |                                                                  |                |                                    | Current                      | 25                 | 2.18 (1.07–4.43)                    |                    |                                                                             |          |
|                          |                                                                           |                                                           |                                                                  |                |                                    | Men                          |                    |                                     |                    |                                                                             |          |
|                          |                                                                           |                                                           |                                                                  |                |                                    | Never                        | 7                  | 1.00                                |                    |                                                                             | Age, sex |
|                          |                                                                           |                                                           |                                                                  |                |                                    | Past                         | 5                  | 2.56 (0.81–8.12)                    |                    |                                                                             |          |
|                          |                                                                           |                                                           |                                                                  |                |                                    | Current                      | 23                 | 2.58 (1.09–6.10)                    |                    |                                                                             |          |
|                          |                                                                           |                                                           |                                                                  |                |                                    | Women                        |                    |                                     |                    |                                                                             |          |
|                          |                                                                           |                                                           |                                                                  |                |                                    | Never                        | 19                 | 1.00                                |                    |                                                                             | Age, sex |
| Inoue et al. (1996) (10) | 1985–1995 (mean 6 yr)                                                     | 5373 subjects (2552 men and 2821 women)                   | Patients who underwent endoscopy at Aichi Cancer Center Hospital | Incidence      | 69 cases (51 men and 18 women)     | Past                         |                    |                                     |                    | Age, sex                                                                    |          |
|                          |                                                                           |                                                           |                                                                  |                |                                    | Current                      |                    |                                     |                    |                                                                             |          |
|                          |                                                                           |                                                           |                                                                  |                |                                    | Men and women                |                    |                                     |                    |                                                                             |          |
|                          |                                                                           |                                                           |                                                                  |                |                                    | Without atrophic gastritis   |                    |                                     |                    |                                                                             |          |
|                          |                                                                           |                                                           |                                                                  |                |                                    | Never                        |                    | 1.00                                |                    |                                                                             |          |
|                          |                                                                           |                                                           |                                                                  |                |                                    | Past                         | Not specified      | 0.73 (0.29–1.81)                    |                    |                                                                             |          |
|                          |                                                                           |                                                           |                                                                  |                |                                    | Current 1–19 cigarettes/day  |                    | 0.66 (0.20–2.18)                    |                    |                                                                             |          |
|                          |                                                                           |                                                           |                                                                  |                |                                    | ≥20                          |                    | 1.57 (0.71–3.48)                    |                    |                                                                             |          |
|                          |                                                                           |                                                           |                                                                  |                |                                    | With atrophic gastritis      |                    |                                     |                    |                                                                             |          |
|                          |                                                                           |                                                           |                                                                  |                |                                    | Never                        | 25                 | 1.00                                |                    |                                                                             |          |
|                          |                                                                           |                                                           |                                                                  |                |                                    | Past                         | 14                 | 0.85 (0.39–1.85)                    |                    |                                                                             |          |

|                                |           |            |                                                           |           |         |                             |     |                  |  |                                                                                                                            |      |
|--------------------------------|-----------|------------|-----------------------------------------------------------|-----------|---------|-----------------------------|-----|------------------|--|----------------------------------------------------------------------------------------------------------------------------|------|
| Mizoue et al.<br>(2000) (11)   | 1986–1996 | 4050 men   | Residents in 4 municipalities of Fukuoka Prefecture       | Death     | 53 men  | Current 1–19 cigarettes/day | 4   | 0.69 (0.22–2.14) |  | Age, residence, alcohol                                                                                                    |      |
|                                |           |            |                                                           |           |         | ≥20                         | 19  | 1.57(0.74–3.32)  |  |                                                                                                                            |      |
|                                |           |            |                                                           |           |         | Never                       | 5   | 1.0              |  |                                                                                                                            |      |
|                                |           |            |                                                           |           |         | Past                        | 22  | 2.2 (0.8–6.0)    |  |                                                                                                                            |      |
|                                |           |            |                                                           |           |         | Current                     | 26  | 2.2 (0.8–5.7)    |  |                                                                                                                            |      |
|                                |           |            |                                                           |           |         | 1–24 cigarettes / day       | 20  | 2.2 (0.8–6.0)    |  |                                                                                                                            |      |
| Sasazuki et al.<br>(2002) (12) | 1990–1999 | 19 657 men | Residents in 14 administrative districts of 4 prefectures | Incidence | 293 men | ≥25                         | 6   | 1.9 (0.6–6.4)    |  | Age, area, alcohol drinking, consumption of fruit, green or yellow vegetables, salted cod roe or fish gut, body mass index |      |
|                                |           |            |                                                           |           |         | Never                       | 41  | 1.0              |  |                                                                                                                            |      |
|                                |           |            |                                                           |           |         | Past                        | 69  | 1.6 (1.1–2.4)    |  |                                                                                                                            |      |
|                                |           |            |                                                           |           |         | Current                     | 163 | 1.7 (1.2–2.4)    |  |                                                                                                                            |      |
|                                |           |            |                                                           |           |         | 1–19 cigarettes/day         | 40  | 1.5 (0.9–2.3)    |  |                                                                                                                            |      |
|                                |           |            |                                                           |           |         | 20                          | 79  | 2.0 (1.4–3.0)    |  |                                                                                                                            |      |
|                                |           |            |                                                           |           |         | ≥21                         | 43  | 1.5 (1.0–2.4)    |  |                                                                                                                            | 0.63 |
|                                |           |            |                                                           |           |         | Start ≥21 years old         | 57  | 1.9 (1.3–2.9)    |  |                                                                                                                            |      |
|                                |           |            |                                                           |           |         | 20                          | 74  | 1.6 (1.1–2.4)    |  |                                                                                                                            |      |
|                                |           |            |                                                           |           |         | 10–19                       | 32  | 1.6 (1.0–2.6)    |  |                                                                                                                            | 0.38 |
|                                |           |            |                                                           |           |         | 0.05–20.9 pack-year         | 54  | 1.4 (0.9–2.1)    |  |                                                                                                                            |      |
|                                |           |            |                                                           |           |         | 21–33                       | 78  | 1.9 (1.3–2.8)    |  |                                                                                                                            |      |
|                                |           |            |                                                           |           |         | ≥33.15                      | 91  | 1.7 (1.2–2.5)    |  |                                                                                                                            | 0.26 |
|                                |           |            |                                                           |           |         | Cardia and upper-third      |     |                  |  |                                                                                                                            |      |
|                                |           |            |                                                           |           |         | All histological types      |     |                  |  |                                                                                                                            |      |
|                                |           |            |                                                           |           |         | Never                       | 4   | 1.0              |  |                                                                                                                            |      |
|                                |           |            |                                                           |           |         | Past                        | 7   | 1.6 (0.5–5.5)    |  |                                                                                                                            |      |
|                                |           |            |                                                           |           |         | Current                     | 24  | 2.4 (0.8–7.1)    |  |                                                                                                                            |      |
|                                |           |            |                                                           |           |         | 1–19 cigarettes/day         | 6   | 2.0 (0.6–7.2)    |  |                                                                                                                            |      |
|                                |           |            |                                                           |           |         | 20                          | 12  | 3.0 (0.9–9.6)    |  |                                                                                                                            |      |
|                                |           |            |                                                           |           |         | ≥21                         | 6   | 2.2 (0.6–8.0)    |  |                                                                                                                            | 0.83 |
|                                |           |            |                                                           |           |         | Start ≥21 years old         | 13  | 4.2 (1.3–13.1)   |  |                                                                                                                            |      |
|                                |           |            |                                                           |           |         | 20                          | 6   | 1.2 (0.3–4.5)    |  |                                                                                                                            |      |
|                                |           |            |                                                           |           |         | 10–19                       | 5   | 2.4 (0.6 – 9.5)  |  |                                                                                                                            | 0.06 |

Continued

**Table 1.** *Continued*

| Reference | Study period | Study population                |                    |                |                                    | Category               | Number among cases | Relative risk (95% CI or <i>P</i> ) | <i>P</i> for trend | Confounding variables considered | Comments |
|-----------|--------------|---------------------------------|--------------------|----------------|------------------------------------|------------------------|--------------------|-------------------------------------|--------------------|----------------------------------|----------|
|           |              | Number of subjects for analysis | Source of subjects | Event followed | Number of incident cases or deaths |                        |                    |                                     |                    |                                  |          |
|           |              |                                 |                    |                |                                    | 0.05–20.9 pack-year    | 7                  | 1.7 (0.5–5.9)                       |                    |                                  |          |
|           |              |                                 |                    |                |                                    | 21–33                  | 12                 | 2.8 (0.9–8.9)                       |                    |                                  |          |
|           |              |                                 |                    |                |                                    | ≥33.15                 | 9                  | 1.6 (0.5–5.5)                       | 0.85               |                                  |          |
|           |              |                                 |                    |                |                                    | Distal gastric cancer  |                    |                                     |                    |                                  |          |
|           |              |                                 |                    |                |                                    | Differentiated types   |                    |                                     |                    |                                  |          |
|           |              |                                 |                    |                |                                    | Never                  | 16                 | 1.0                                 |                    |                                  |          |
|           |              |                                 |                    |                |                                    | Past                   | 33                 | 2.0 (1.1–3.7)                       |                    |                                  |          |
|           |              |                                 |                    |                |                                    | Current                | 75                 | 2.1 (1.2–3.6)                       |                    |                                  |          |
|           |              |                                 |                    |                |                                    | 1–19 cigarettes/day    | 19                 | 1.9 (1.0–3.7)                       |                    |                                  |          |
|           |              |                                 |                    |                |                                    | 20                     | 31                 | 2.2 (1.2 – 4.1)                     |                    |                                  |          |
|           |              |                                 |                    |                |                                    | ≥21                    | 25                 | 2.6 (1.3–4.9)                       | 0.31               |                                  |          |
|           |              |                                 |                    |                |                                    | Start ≥21 years old    | 25                 | 2.2 (1.2 – 4.3)                     |                    |                                  |          |
|           |              |                                 |                    |                |                                    | 20                     | 35                 | 2.2 (1.2–4.0)                       |                    |                                  |          |
|           |              |                                 |                    |                |                                    | 10–19                  | 15                 | 2.2 (1.1–4.5)                       | 0.81               |                                  |          |
|           |              |                                 |                    |                |                                    | 0.05–20.9 pack-year    | 20                 | 1.3 (0.7–2.6)                       |                    |                                  |          |
|           |              |                                 |                    |                |                                    | 21–33                  | 42                 | 2.7 (1.5–4.9)                       |                    |                                  |          |
|           |              |                                 |                    |                |                                    | ≥33.15                 | 42                 | 2.2 (1.2–4.0)                       | 0.16               |                                  |          |
|           |              |                                 |                    |                |                                    | Undifferentiated types |                    |                                     |                    |                                  |          |
|           |              |                                 |                    |                |                                    | Never                  | 18                 | 1.0                                 |                    |                                  |          |
|           |              |                                 |                    |                |                                    | Past                   | 18                 | 0.9 (0.5–1.8)                       |                    |                                  |          |
|           |              |                                 |                    |                |                                    | Current                | 27                 | 0.6 (0.3–1.1)                       |                    |                                  |          |
|           |              |                                 |                    |                |                                    | 1–19 cigarettes/day    | 11                 | 0.9 (0.4–1.8)                       |                    |                                  |          |
|           |              |                                 |                    |                |                                    | 20                     | 11                 | 0.6 (0.3–1.3)                       |                    |                                  |          |
|           |              |                                 |                    |                |                                    | ≥21                    | 5                  | 0.3 (0.1–0.8)                       | 0.09               |                                  |          |
|           |              |                                 |                    |                |                                    | Start ≥21 years old    | 6                  | 0.4 (0.2–1.1)                       |                    |                                  |          |
|           |              |                                 |                    |                |                                    | 20                     | 16                 | 0.7 (0.4–1.5)                       |                    |                                  |          |
|           |              |                                 |                    |                |                                    | 1–19                   | 5                  | 0.5 (0.2–1.4)                       | 0.50               |                                  |          |
|           |              |                                 |                    |                |                                    | 0.05–20.9 pack-year    | 19                 | 1.0 (0.5–2.0)                       |                    |                                  |          |
|           |              |                                 |                    |                |                                    | 21–33                  | 10                 | 0.5 (0.2–1.1)                       |                    |                                  |          |

|                               |           |                                                             |                                                                              |           |                      |                             |     |                  |        |                                                                                                                                                                                                                                            |
|-------------------------------|-----------|-------------------------------------------------------------|------------------------------------------------------------------------------|-----------|----------------------|-----------------------------|-----|------------------|--------|--------------------------------------------------------------------------------------------------------------------------------------------------------------------------------------------------------------------------------------------|
| Fujino et al.<br>(2002) (13)  | 1988–1997 | 18 746 men<br>26 184 women<br><br>≥ 18 years old<br>in 1949 | Residents in 45<br>areas throughout<br>Japan                                 | Death     | 261 men<br>118 women | ≥33.15                      | 16  | 0.6 (0.3–1.3)    | 0.20   | Age                                                                                                                                                                                                                                        |
|                               |           |                                                             |                                                                              |           |                      | Men                         |     |                  |        |                                                                                                                                                                                                                                            |
|                               |           |                                                             |                                                                              |           |                      | Never                       | 42  | 1.00             |        |                                                                                                                                                                                                                                            |
|                               |           |                                                             |                                                                              |           |                      | Past                        | 84  | 1.12 (0.77–1.62) |        |                                                                                                                                                                                                                                            |
|                               |           |                                                             |                                                                              |           |                      | Current                     | 125 | 1.26 (0.88–1.78) |        |                                                                                                                                                                                                                                            |
|                               |           |                                                             |                                                                              |           |                      | Women                       |     |                  |        |                                                                                                                                                                                                                                            |
|                               |           |                                                             |                                                                              |           |                      | Never                       | 94  | 1.00             |        |                                                                                                                                                                                                                                            |
|                               |           |                                                             |                                                                              |           |                      | Past                        | 1   | 0.44 (0.06–3.13) |        |                                                                                                                                                                                                                                            |
|                               |           |                                                             |                                                                              |           |                      | Current                     | 3   | 0.63 (0.20–1.98) |        |                                                                                                                                                                                                                                            |
|                               |           |                                                             |                                                                              |           |                      |                             |     |                  |        |                                                                                                                                                                                                                                            |
| Koizumi et al.<br>(2003) (14) | cohort 1  | Cohort 1 9980<br>men                                        | Cohort 1<br><br>Residents in three<br>municipalities of<br>Miyagi Prefecture | Incidence | Cohort 1 228<br>men  | Cohort 1                    |     |                  |        | Age, body<br>mass index,<br>history of<br>peptic ulcer,<br>parental<br>history of<br>gastric cancer,<br>type of health<br>insurance,<br>alcohol, daily<br>consumption<br>of pickled<br>vegetables,<br>consumption<br>of bean–paste<br>soup |
|                               | 1984–1992 | Cohort<br>2 19 412 men                                      |                                                                              |           | Cohort 2 223<br>men  | Never                       | 37  | 1.00             |        |                                                                                                                                                                                                                                            |
|                               | cohort 2  | Cohort 1 ≥40<br>years old                                   | Cohort 2<br><br>Residents in 14<br>municipalities of<br>Miyagi Prefecture    |           |                      | Past                        | 59  | 1.89 (1.24–2.87) |        |                                                                                                                                                                                                                                            |
|                               | 1990–1997 | Cohort 2 40–<br>64 years old                                |                                                                              |           |                      | Current                     | 132 | 1.91 (1.31–2.79) |        |                                                                                                                                                                                                                                            |
|                               |           |                                                             |                                                                              |           |                      | Cohort 2                    |     |                  |        |                                                                                                                                                                                                                                            |
|                               |           |                                                             |                                                                              |           |                      | Never                       | 28  | 1.00             |        |                                                                                                                                                                                                                                            |
|                               |           |                                                             |                                                                              |           |                      | Past                        | 44  | 1.63 (1.01–2.63) |        |                                                                                                                                                                                                                                            |
|                               |           |                                                             |                                                                              |           |                      | Current                     | 151 | 1.76 (1.17–2.66) |        |                                                                                                                                                                                                                                            |
|                               |           |                                                             |                                                                              |           |                      | Pooled                      |     |                  |        |                                                                                                                                                                                                                                            |
|                               |           |                                                             |                                                                              |           |                      | Never                       | 65  | 1.00             |        |                                                                                                                                                                                                                                            |
|                               |           |                                                             |                                                                              |           |                      | Past                        | 103 | 1.77 (1.29–2.43) |        |                                                                                                                                                                                                                                            |
|                               |           |                                                             |                                                                              |           |                      | Current                     | 283 | 1.84 (1.39–2.43) |        |                                                                                                                                                                                                                                            |
|                               |           |                                                             |                                                                              |           |                      | 1–19 cigarettes/day         | 74  | 1.41 (1.00–1.98) |        |                                                                                                                                                                                                                                            |
|                               |           |                                                             |                                                                              |           |                      | 20–24                       | 123 | 1.98 (1.45–2.71) |        |                                                                                                                                                                                                                                            |
|                               |           |                                                             |                                                                              |           |                      | ≥25                         | 86  | 2.15 (1.53–3.02) | < 0.05 |                                                                                                                                                                                                                                            |
|                               |           |                                                             |                                                                              |           |                      | <5 years after<br>cessation | 35  | 1.72 (1.12–2.64) |        |                                                                                                                                                                                                                                            |
|                               |           |                                                             |                                                                              |           |                      | 5–14                        | 48  | 2.08 (1.41–3.07) |        |                                                                                                                                                                                                                                            |
|                               |           |                                                             |                                                                              |           |                      | ≥15                         | 20  | 1.31 (0.77–2.21) |        |                                                                                                                                                                                                                                            |
|                               |           |                                                             |                                                                              |           |                      | Cardia                      |     |                  |        |                                                                                                                                                                                                                                            |
|                               |           |                                                             |                                                                              |           |                      | Never                       | 12  | 1.00             |        |                                                                                                                                                                                                                                            |
|                               |           |                                                             |                                                                              |           |                      | Past                        | 12  | 1.17 (0.52–2.64) |        |                                                                                                                                                                                                                                            |
|                               |           |                                                             |                                                                              |           |                      | Current                     | 40  | 1.29 (0.64–2.61) |        |                                                                                                                                                                                                                                            |

Continued

**Table 1.** *Continued*

| Reference | Study period | Study population                |                    |                |                                    | Category            | Number among cases | Relative risk (95% CI or <i>P</i> ) | <i>P</i> for trend | Confounding variables considered | Comments |
|-----------|--------------|---------------------------------|--------------------|----------------|------------------------------------|---------------------|--------------------|-------------------------------------|--------------------|----------------------------------|----------|
|           |              | Number of subjects for analysis | Source of subjects | Event followed | Number of incident cases or deaths |                     |                    |                                     |                    |                                  |          |
|           |              |                                 |                    |                |                                    | 1–19 cigarettes/day | 13                 | 1.42 (0.63–3.23)                    |                    |                                  |          |
|           |              |                                 |                    |                |                                    | 20–24               | 13                 | 1.09 (0.45–2.62)                    |                    |                                  |          |
|           |              |                                 |                    |                |                                    | ≥25                 | 14                 | 1.74 (0.70–4.33)                    | 0.27               |                                  |          |
|           |              |                                 |                    |                |                                    | Body                |                    |                                     |                    |                                  |          |
|           |              |                                 |                    |                |                                    | Never               | 17                 | 1.00                                |                    |                                  |          |
|           |              |                                 |                    |                |                                    | Past                | 26                 | 1.62 (0.84–3.13)                    |                    |                                  |          |
|           |              |                                 |                    |                |                                    | Current             | 62                 | 1.22 (0.69–2.15)                    |                    |                                  |          |
|           |              |                                 |                    |                |                                    | 1–19 cigarettes/day | 15                 | 1.15 (0.54–2.47)                    |                    |                                  |          |
|           |              |                                 |                    |                |                                    | 20–24               | 28                 | 1.49 (0.79–2.82)                    |                    |                                  |          |
|           |              |                                 |                    |                |                                    | ≥25                 | 19                 | 1.47 (0.74–2.95)                    | 0.10               |                                  |          |
|           |              |                                 |                    |                |                                    | Antrum              |                    |                                     |                    |                                  |          |
|           |              |                                 |                    |                |                                    | Never               | 15                 | 1.00                                |                    |                                  |          |
|           |              |                                 |                    |                |                                    | Past                | 28                 | 2.08 (1.10–3.95)                    |                    |                                  |          |
|           |              |                                 |                    |                |                                    | Current             | 77                 | 2.00 (1.13–3.55)                    |                    |                                  |          |
|           |              |                                 |                    |                |                                    | 1–19 cigarettes/day | 15                 | 1.19 (0.57–2.48)                    |                    |                                  |          |
|           |              |                                 |                    |                |                                    | 20–24               | 35                 | 2.34 (1.24–4.40)                    |                    |                                  |          |
|           |              |                                 |                    |                |                                    | ≥25                 | 27                 | 2.79 (1.42–5.48)                    | <0.05              |                                  |          |
|           |              |                                 |                    |                |                                    | Differentiated      |                    |                                     |                    |                                  |          |
|           |              |                                 |                    |                |                                    | Never               | 38                 | 1.00                                |                    |                                  |          |
|           |              |                                 |                    |                |                                    | Past                | 60                 | 1.77 (1.17–2.67)                    |                    |                                  |          |
|           |              |                                 |                    |                |                                    | Current             | 147                | 1.61 (1.11–2.32)                    |                    |                                  |          |
|           |              |                                 |                    |                |                                    | 1–19 cigarettes/day | 37                 | 1.20 (0.76–1.91)                    |                    |                                  |          |
|           |              |                                 |                    |                |                                    | 20–24               | 63                 | 1.70 (1.12–2.58)                    |                    |                                  |          |
|           |              |                                 |                    |                |                                    | ≥25                 | 47                 | 1.97 (1.26–3.09)                    | <0.05              |                                  |          |
|           |              |                                 |                    |                |                                    | Nondifferentiated   |                    |                                     |                    |                                  |          |
|           |              |                                 |                    |                |                                    | Never               | 11                 | 1.00                                |                    |                                  |          |
|           |              |                                 |                    |                |                                    | Past                | 16                 | 1.56 (0.72–3.41)                    |                    |                                  |          |
|           |              |                                 |                    |                |                                    | Current             | 56                 | 2.10 (1.08–4.08)                    |                    |                                  |          |
|           |              |                                 |                    |                |                                    | 1–19 cigarettes/day | 13                 | 1.66 (0.73–3.78)                    |                    |                                  |          |
|           |              |                                 |                    |                |                                    | 20–24               | 28                 | 2.61 (1.27–5.35)                    |                    |                                  |          |
|           |              |                                 |                    |                |                                    | ≥25                 | 15                 | 2.05 (0.92–4.59)                    | <0.05              |                                  |          |

|                              |           |                    |                                              |       |           |                           |     |                  |                                                                                                    |
|------------------------------|-----------|--------------------|----------------------------------------------|-------|-----------|---------------------------|-----|------------------|----------------------------------------------------------------------------------------------------|
| Fujino et al.<br>(2005) (15) | 1988–1999 | 43 482 men         | Residents in 45<br>areas throughout<br>Japan | Death | 522 men   | Men                       |     |                  | Age, alcohol,<br>education<br>level,<br>preference for<br>salty foods,<br>green tea<br>consumption |
|                              |           | 54 480 women       |                                              |       | 235 women | Never                     | 87  | 1.00             |                                                                                                    |
|                              |           | 40–79 years<br>old |                                              |       |           | Past                      | 164 | 1.24 (0.95–1.61) |                                                                                                    |
|                              |           |                    |                                              |       |           | Current                   | 271 | 1.33 (1.04–1.70) |                                                                                                    |
|                              |           |                    |                                              |       |           | 1–14 cigarettes/day       | 62  | 1.27 (0.91–1.76) |                                                                                                    |
|                              |           |                    |                                              |       |           | 15–24                     | 162 | 1.40 (1.08–1.83) |                                                                                                    |
|                              |           |                    |                                              |       |           | 25–34                     | 27  | 1.01 (0.65–1.56) |                                                                                                    |
|                              |           |                    |                                              |       |           | ≥35                       | 20  | 1.64 (1.00–2.68) |                                                                                                    |
|                              |           |                    |                                              |       |           | 1–399 cigarette-<br>years | 30  | 1.38 (0.91–2.08) |                                                                                                    |
|                              |           |                    |                                              |       |           | 400–799                   | 114 | 1.36 (1.04–1.79) |                                                                                                    |
|                              |           |                    |                                              |       |           | ≥800                      | 116 | 1.31 (1.00–1.72) |                                                                                                    |
|                              |           |                    |                                              |       |           | Women                     |     |                  |                                                                                                    |
|                              |           |                    |                                              |       |           | Never                     | 220 | 1.00             |                                                                                                    |
|                              |           |                    |                                              |       |           | Past                      | 6   | 1.17 (0.51–2.65) |                                                                                                    |
|                              |           |                    |                                              |       |           | Current                   | 9   | 0.77 (0.39–1.50) |                                                                                                    |
|                              |           |                    |                                              |       |           | 1–14 cigarettes/day       | 6   | 0.86 (0.38–1.94) |                                                                                                    |
|                              |           |                    |                                              |       |           | 15–24                     | 3   | 0.74 (0.24–2.32) |                                                                                                    |
|                              |           |                    |                                              |       |           | 25–34                     | 0   | —                |                                                                                                    |
|                              |           |                    |                                              |       |           | ≥35                       | 0   | —                |                                                                                                    |
|                              |           |                    |                                              |       |           | 1–399 cigarette-<br>years | 3   | 0.48 (0.15–1.49) |                                                                                                    |
|                              |           |                    |                                              |       |           | 400–799                   | 6   | 1.79 (0.79–4.05) |                                                                                                    |
|                              |           |                    |                                              |       |           | ≥800                      | 0   | —                |                                                                                                    |

---

**Table 2.** Tobacco smoking and gastric cancer risk, case–control study in Japanese population

| References                     | Study period | Study subjects                                                                    |                                                                                                                                         |                        |                     | Category                                            | Relative risk<br>(95%CI or <i>P</i> ) | <i>P</i> for trend | Confounding<br>variables<br>considered                                                          | Comments    |
|--------------------------------|--------------|-----------------------------------------------------------------------------------|-----------------------------------------------------------------------------------------------------------------------------------------|------------------------|---------------------|-----------------------------------------------------|---------------------------------------|--------------------|-------------------------------------------------------------------------------------------------|-------------|
|                                |              | Type and<br>source                                                                | Definition                                                                                                                              | Number of cases        | Number of controls  |                                                     |                                       |                    |                                                                                                 |             |
| Haenszel et al.<br>(1976) (16) | 1962–1964    | Hospital-based<br>(6 hospitals in<br>Hiroshima and<br>two hospitals<br>in Miyagi) | Cases: histologically<br>confirmed in 98%<br>cases<br><br>Controls: patients<br>with other diseases in<br>the same hospital<br>services | 247 men<br>(Hiroshima) | 494 men (Hiroshima) | Nonusage                                            | 1.0                                   |                    | Matched (1:2) for<br>sex, age, hospital                                                         |             |
|                                | (Hiroshima)  |                                                                                   |                                                                                                                                         | 279 men (Miyagi)       | 558 men (Miyagi)    | Tabacco Use                                         | 1.14 (Hiroshima)                      |                    | Adjusted for age,<br>sex, prefecture,<br>occupation (farm,<br>nonfarm)                          |             |
|                                | 1962–1965    |                                                                                   |                                                                                                                                         |                        |                     |                                                     | 1.31 (Miyagi)                         |                    |                                                                                                 |             |
|                                | (Miyagi)     |                                                                                   |                                                                                                                                         |                        |                     |                                                     |                                       |                    |                                                                                                 |             |
| Tajima et al.<br>(1985) (17)   | 1981–1984    | Hospital-based<br>(Aichi Cancer<br>Center)                                        | Cases: diagnosed on<br>both clinical and<br>histopathological<br>examinations<br><br>Controls: patients<br>without cancer               | 59 men                 | 111 men             | Never                                               | 1.00                                  |                    | Matched for sex,<br>age ( $\pm 5$ yrs),<br>time of interview<br>( $\pm 6$ months)               | $*P < 0.05$ |
|                                |              |                                                                                   |                                                                                                                                         |                        |                     | Current                                             | 1.99                                  |                    |                                                                                                 |             |
|                                |              |                                                                                   |                                                                                                                                         |                        |                     | Current (adjusted<br>by history of<br>education)    | 2.06                                  |                    | Adjusted for age,<br>sex                                                                        |             |
|                                |              |                                                                                   |                                                                                                                                         |                        |                     | Brinkman Index<br><600                              | 1.18                                  |                    |                                                                                                 |             |
|                                |              |                                                                                   |                                                                                                                                         |                        |                     | $\geq 600$                                          | 2.76                                  |                    |                                                                                                 |             |
|                                |              |                                                                                   |                                                                                                                                         |                        |                     | Start <20 years<br>olds                             | 3.96*                                 |                    |                                                                                                 |             |
|                                |              |                                                                                   |                                                                                                                                         |                        |                     | $\geq 20$                                           | 2.18                                  |                    |                                                                                                 |             |
| Hoshino et al.<br>(1985) (18)  | 1979–1982    | Hospital-<br>based                                                                | Cases: operated at the<br>National Cancer<br>Center Hospital<br><br>Control: clinic<br>patients at Minatoku<br>and Setagayaku           | 460 cases              | 460 controls        | Men and Women                                       |                                       |                    | Matched(1:1) for<br>sex, age (under 59<br>yrs or over 60<br>years), family<br>history of cancer | $*P < 0.05$ |
|                                |              |                                                                                   |                                                                                                                                         |                        |                     | Gastric cancer<br>family history (–)<br>smoking (–) | 1.00                                  |                    |                                                                                                 |             |
|                                |              |                                                                                   |                                                                                                                                         |                        |                     | Gastric cancer<br>family history (+)<br>smoking (–) | 1.67*                                 |                    |                                                                                                 |             |
|                                |              |                                                                                   |                                                                                                                                         |                        |                     | Gastric cancer<br>family history (–)<br>smoking (+) | 2.88*                                 |                    |                                                                                                 |             |
|                                |              |                                                                                   |                                                                                                                                         |                        |                     | Gastric cancer<br>family history (+)<br>smoking (+) | 4.30*                                 |                    |                                                                                                 |             |

Continued

**Table 2.** *Continued*

| References                 | Study period | Study subjects                                       |                                                                             |                    |                     | Category                  | Relative risk<br>(95%CI or <i>P</i> ) | <i>P</i> for trend | Confounding<br>variables<br>considered                                 | Comments                                                              |
|----------------------------|--------------|------------------------------------------------------|-----------------------------------------------------------------------------|--------------------|---------------------|---------------------------|---------------------------------------|--------------------|------------------------------------------------------------------------|-----------------------------------------------------------------------|
|                            |              | Type and<br>source                                   | Definition                                                                  | Number of cases    | Number of controls  |                           |                                       |                    |                                                                        |                                                                       |
| Kono et al.<br>(1988) (19) | 1979–1982    | Hospital-<br>based (Karatsu<br>Stomach<br>Institute) | Cases: histologically<br>confirmed in 88%<br>cases                          | 74 men<br>65 women | Hospital controls   | Hospital controls         |                                       |                    | Hospital controls                                                      | * <i>P</i> < 0.05                                                     |
|                            |              |                                                      |                                                                             |                    | 1171 men            | Men                       |                                       |                    | Adjusted for age,<br>sex                                               | 3) Smoked at<br>least one<br>cigarette/day<br>for 6 months<br>or more |
|                            |              |                                                      | Hospital controls:<br>patients without<br>gastric cancer                    |                    | 1403 women          | Never                     | 1.0                                   |                    | 1) Adjusted for<br>age, sex,<br>mandarin oranges,<br>fruits, green tea |                                                                       |
|                            |              |                                                      |                                                                             |                    | Population controls | Ever<br>Low <sup>3)</sup> | 1.2                                   |                    |                                                                        |                                                                       |
|                            |              |                                                      | Population controls:<br>drawn from the<br>computerized file of<br>residents |                    | 148 men             | High <sup>4)</sup>        | 1.9                                   | <0.05              |                                                                        | 4) Smoked<br>≥20<br>cigarettes/day<br>and for<br>30 ≥years            |
|                            |              |                                                      |                                                                             |                    | 130 women           | Women                     |                                       |                    |                                                                        |                                                                       |
|                            |              |                                                      |                                                                             |                    |                     | Never                     | 1.0                                   |                    |                                                                        |                                                                       |
|                            |              |                                                      |                                                                             |                    |                     | Ever<br>Low <sup>3)</sup> | 2.5*                                  |                    |                                                                        |                                                                       |
|                            |              |                                                      |                                                                             |                    |                     | High <sup>4)</sup>        | 1.4                                   | <0.05              |                                                                        |                                                                       |
|                            |              |                                                      |                                                                             |                    |                     | Men and Women             |                                       |                    |                                                                        |                                                                       |
|                            |              |                                                      |                                                                             |                    |                     | Never                     | 1.0                                   |                    |                                                                        |                                                                       |
|                            |              |                                                      |                                                                             |                    |                     | Ever<br>Low <sup>3)</sup> | 1.7*                                  |                    |                                                                        |                                                                       |
|                            |              |                                                      |                                                                             |                    |                     | High <sup>4)</sup>        | 2.5*                                  | <0.05              |                                                                        |                                                                       |
|                            |              |                                                      |                                                                             |                    |                     | Ever                      | 1.8 (1.1–2.9) <sup>1)</sup>           |                    |                                                                        |                                                                       |
|                            |              |                                                      |                                                                             |                    |                     | Population controls       |                                       |                    | Population<br>controls                                                 |                                                                       |
|                            |              |                                                      |                                                                             |                    |                     | Men                       |                                       |                    | Mached (1:2) for<br>sex, year of birth                                 |                                                                       |
|                            |              |                                                      |                                                                             |                    |                     | Never                     | 1.0                                   |                    |                                                                        |                                                                       |
|                            |              |                                                      |                                                                             |                    |                     | Ever<br>Low <sup>3)</sup> | 1.1                                   | NS                 | 2) Adjusted for<br>mandarin oranges,<br>fruits, green tea              |                                                                       |
|                            |              |                                                      |                                                                             |                    |                     | High <sup>4)</sup>        | 1.8                                   |                    |                                                                        |                                                                       |
|                            |              |                                                      |                                                                             |                    |                     | Women                     |                                       |                    |                                                                        |                                                                       |
|                            |              |                                                      |                                                                             |                    |                     | Never                     | 1.0                                   |                    |                                                                        |                                                                       |
|                            |              |                                                      |                                                                             |                    |                     | Ever<br>Low <sup>3)</sup> | 1.1                                   | NS                 |                                                                        |                                                                       |
|                            |              |                                                      |                                                                             |                    |                     | High <sup>4)</sup>        | 1.0                                   |                    |                                                                        |                                                                       |

|                            |           |                                      |                                                                              |           |                                                                                                   | Men and Women               |                             |                                                                                                 |
|----------------------------|-----------|--------------------------------------|------------------------------------------------------------------------------|-----------|---------------------------------------------------------------------------------------------------|-----------------------------|-----------------------------|-------------------------------------------------------------------------------------------------|
|                            |           |                                      |                                                                              |           |                                                                                                   | Never                       | 1.0                         |                                                                                                 |
| Unakami et al. (1989) (20) | 1977–1986 | Hospital-based (Toranomom Hospital)  | Cases: operated at Toranomom Hospital                                        | 924 men   | 140 men                                                                                           | Ever Low <sup>3)</sup>      | 1.1                         | NS                                                                                              |
|                            |           |                                      |                                                                              |           |                                                                                                   | High <sup>4)</sup>          | 1.8                         |                                                                                                 |
|                            |           |                                      |                                                                              |           |                                                                                                   | Ever                        | 1.3 (0.8–2.2) <sup>2)</sup> |                                                                                                 |
|                            |           |                                      | Controls: outpatients without gastric cancer receiving gastroendoscopic exam | 423 women | 81 women                                                                                          | Men                         |                             |                                                                                                 |
|                            |           |                                      |                                                                              |           |                                                                                                   | Never                       | 1.0                         |                                                                                                 |
|                            |           |                                      |                                                                              |           |                                                                                                   | Smoker                      | 2.8                         |                                                                                                 |
|                            |           |                                      | Women                                                                        |           | No significant difference in the habit of smoking were observed between patients and the controls |                             |                             |                                                                                                 |
| Kato et al. (1990) (21)    | 1985–1989 | Hospital-based (Aichi Cancer Center) | Cases: histologically confirmed after receiving gastroscopic examinations    | 289 men   | 1247 men                                                                                          | Men                         |                             | Adjusted for age, residence, breakfast, salted fish gut, cod roe, past history of gastric ulcer |
|                            |           |                                      |                                                                              | 138 women | 1767 women                                                                                        | Never                       | 1.00                        |                                                                                                 |
|                            |           |                                      |                                                                              |           |                                                                                                   | Ex-smoker                   | 1.90 (1.19–3.03)            |                                                                                                 |
|                            |           |                                      |                                                                              |           |                                                                                                   | Current 1–19 cigarettes/day | 1.83 (1.02–3.28)            |                                                                                                 |
|                            |           |                                      |                                                                              |           |                                                                                                   | ≥20                         | 2.84 (1.79–4.51)            |                                                                                                 |
|                            |           |                                      |                                                                              |           |                                                                                                   | Diffuse type                |                             |                                                                                                 |
|                            |           |                                      |                                                                              |           |                                                                                                   | Never                       | 1.00                        | Adjusted for age, residence                                                                     |
|                            |           |                                      |                                                                              |           |                                                                                                   | Ex-smoker                   | 2.67 (1.37–5.22)            |                                                                                                 |
|                            |           |                                      |                                                                              |           |                                                                                                   | Current 1–19 cigarettes/day | 1.76 (0.73–4.22)            |                                                                                                 |
|                            |           |                                      |                                                                              |           |                                                                                                   | ≥20                         | 3.32 (1.71–6.44)            |                                                                                                 |
|                            |           |                                      |                                                                              |           |                                                                                                   | Intestinal type             |                             |                                                                                                 |
|                            |           |                                      |                                                                              |           |                                                                                                   | Never                       | 1.00                        |                                                                                                 |
|                            |           |                                      |                                                                              |           |                                                                                                   | Ex-smoker                   | 1.58 (0.91–2.75)            |                                                                                                 |
|                            |           |                                      |                                                                              |           |                                                                                                   | Current 1–19 cigarettes/day | 2.25 (1.16–4.34)            |                                                                                                 |
|                            |           |                                      |                                                                              |           |                                                                                                   | ≥20                         | 2.95 (1.70–5.09)            |                                                                                                 |
|                            |           |                                      |                                                                              |           |                                                                                                   |                             |                             |                                                                                                 |
|                            |           |                                      |                                                                              |           |                                                                                                   |                             |                             |                                                                                                 |
|                            |           |                                      |                                                                              |           |                                                                                                   |                             |                             |                                                                                                 |
|                            |           |                                      |                                                                              |           |                                                                                                   |                             |                             |                                                                                                 |

Continued

**Table 2.** *Continued*

| References | Study period | Study subjects     |            | Category                              | Relative risk<br>(95%CI or <i>P</i> ) | <i>P</i> for trend | Confounding<br>variables<br>considered | Comments |
|------------|--------------|--------------------|------------|---------------------------------------|---------------------------------------|--------------------|----------------------------------------|----------|
|            |              | Type and<br>source | Definition | Number of cases<br>Number of controls |                                       |                    |                                        |          |
|            |              |                    |            | Women                                 |                                       |                    |                                        |          |
|            |              |                    |            | Never                                 | 1.00                                  |                    | Adjusted for age,<br>residence         |          |
|            |              |                    |            | Ex-smoker                             | 1.28 (0.52–3.14)                      |                    |                                        |          |
|            |              |                    |            | Current 1–19<br>cigarettes/day        | 0.63 (0.22–1.79)                      |                    |                                        |          |
|            |              |                    |            | ≥20                                   | 1.53 (0.63–3.74)                      |                    |                                        |          |
|            |              |                    |            | Diffuse type                          |                                       |                    |                                        |          |
|            |              |                    |            | Never                                 | 1.00                                  |                    |                                        |          |
|            |              |                    |            | Ex-smoker                             | 1.01 (0.30–3.39)                      |                    |                                        |          |
|            |              |                    |            | Current 1–19<br>cigarettes/day        | 0.49 (0.12–2.07)                      |                    |                                        |          |
|            |              |                    |            | ≥20                                   | 1.09 (0.33–3.62)                      |                    |                                        |          |
|            |              |                    |            | Intestinal type                       |                                       |                    |                                        |          |
|            |              |                    |            | Never                                 | 1.00                                  |                    |                                        |          |
|            |              |                    |            | Ex-smoker                             | 1.18 (0.26–5.34)                      |                    |                                        |          |
|            |              |                    |            | Current 1–19<br>cigarettes/day        | 0.78 (0.17–3.58)                      |                    |                                        |          |
|            |              |                    |            | ≥20                                   | 2.73 (0.75–9.91)                      |                    |                                        |          |

|                                    |           |                                                              |                                                                                                                  |                                         |                                         |                                                                                                                                  |                                |                                                                   |                                                                                                                                                                                                                                                                             |                   |  |
|------------------------------------|-----------|--------------------------------------------------------------|------------------------------------------------------------------------------------------------------------------|-----------------------------------------|-----------------------------------------|----------------------------------------------------------------------------------------------------------------------------------|--------------------------------|-------------------------------------------------------------------|-----------------------------------------------------------------------------------------------------------------------------------------------------------------------------------------------------------------------------------------------------------------------------|-------------------|--|
| Tominaga<br>et al. (1991)<br>(22)  | 1971–1985 | Hospital-<br>based<br>(Tochigi<br>Cancer<br>Center)          | Cases: newly<br>histologically<br>diagnoed gastric<br>cancer at the center<br>after the mass<br>screening X-rays | 294 cases (188<br>men and 106<br>Women) | 588 controls (376<br>men and 212 women) | Men and Women                                                                                                                    |                                | Matched (1:2) for<br>sex, age<br>(± 5years), area<br>of residency | Persons who<br>had stopped<br>smoking for<br>more than 5<br>years were<br>included in<br>non smoker<br>category and<br>those who<br>had stopped<br>smoking<br>from 1 to 4<br>years were<br>included in<br>the smokers'<br>category                                          |                   |  |
|                                    |           |                                                              |                                                                                                                  |                                         |                                         | Nonsmoker                                                                                                                        | 1.0                            |                                                                   |                                                                                                                                                                                                                                                                             |                   |  |
|                                    |           |                                                              |                                                                                                                  |                                         |                                         | Smoker <20<br>cigarettes/day                                                                                                     | 3.56 (2.39–5.31)               |                                                                   |                                                                                                                                                                                                                                                                             |                   |  |
|                                    |           |                                                              |                                                                                                                  |                                         |                                         | ≥20                                                                                                                              | 2.58 (1.60–4.17)               |                                                                   |                                                                                                                                                                                                                                                                             |                   |  |
|                                    |           |                                                              |                                                                                                                  |                                         |                                         | Control: subjects who<br>received the same<br>early detection<br>program and were<br>verified as being free<br>of gastric cancer |                                |                                                                   |                                                                                                                                                                                                                                                                             |                   |  |
| Hoshiyama<br>et al. (1992)<br>(23) | 1984–1990 | Hospital-<br>based<br>(Saitama<br>Cancer Center<br>Hospital) | Cases: histologically<br>confirmed cases                                                                         | 294 cases (206<br>men and 88<br>women)  | Population controls                     | Men and Women                                                                                                                    |                                | Population<br>controls                                            | Matched (1:1) for<br>sex, age,<br>administrative<br>division                                                                                                                                                                                                                |                   |  |
|                                    |           |                                                              | Hospital controls:<br>inpatients without<br>cancer                                                               |                                         | 294 controls (206<br>men and 88 women)  | Population controls                                                                                                              |                                |                                                                   |                                                                                                                                                                                                                                                                             |                   |  |
|                                    |           |                                                              | Population controls:<br>randomly selected<br>from the electoral roll                                             |                                         |                                         |                                                                                                                                  | Never                          | 1.0                                                               | Adjusted for age,<br>sex,<br>administrative<br>division,<br>preference for<br>salty foods, rice,<br>miso soup, boiled<br>fish, pickled<br>vegetables, nuts,<br>seaweed, soybean<br>products (except<br>miso soup), fruits,<br>green–yellow<br>vegetables, raw<br>vegetables |                   |  |
|                                    |           |                                                              |                                                                                                                  |                                         | Hospital controls                       | Past                                                                                                                             | 1.1 (0.6–2.1)                  |                                                                   |                                                                                                                                                                                                                                                                             |                   |  |
|                                    |           |                                                              |                                                                                                                  |                                         | 202 controls (104<br>men and 98 women)  | Current 1–29<br>cigarettes/day                                                                                                   | 1.2 (0.7–2.3)                  |                                                                   |                                                                                                                                                                                                                                                                             |                   |  |
|                                    |           |                                                              |                                                                                                                  |                                         |                                         | ≥30                                                                                                                              | 1.5 (0.7–3.2)                  |                                                                   |                                                                                                                                                                                                                                                                             |                   |  |
|                                    |           |                                                              |                                                                                                                  |                                         |                                         | Ever ≤800 cigarette<br>years                                                                                                     | 1.5 (0.9–2.4)                  |                                                                   |                                                                                                                                                                                                                                                                             |                   |  |
|                                    |           |                                                              |                                                                                                                  |                                         |                                         | >800                                                                                                                             | 1.6 (0.9–2.8)                  | 0.13                                                              | Adjusted for age,<br>sex,<br>administrative<br>division                                                                                                                                                                                                                     |                   |  |
|                                    |           |                                                              |                                                                                                                  |                                         | Hospital controls                       |                                                                                                                                  |                                |                                                                   |                                                                                                                                                                                                                                                                             | Hospital controls |  |
|                                    |           |                                                              |                                                                                                                  |                                         | Never                                   | 1.0                                                                                                                              | Adjusted for age,<br>sex, area |                                                                   |                                                                                                                                                                                                                                                                             |                   |  |
|                                    |           |                                                              |                                                                                                                  | Past                                    | 0.6 (0.3–1.3)                           |                                                                                                                                  |                                |                                                                   |                                                                                                                                                                                                                                                                             |                   |  |

Continued

**Table 2.** *Continued*

| References                  | Study period | Study subjects                                 |                                                                                                                   |                          |                          | Category                           | Relative risk<br>(95%CI or <i>P</i> ) | <i>P</i> for trend | Confounding<br>variables<br>considered                                                                  | Comments |
|-----------------------------|--------------|------------------------------------------------|-------------------------------------------------------------------------------------------------------------------|--------------------------|--------------------------|------------------------------------|---------------------------------------|--------------------|---------------------------------------------------------------------------------------------------------|----------|
|                             |              | Type and<br>source                             | Definition                                                                                                        | Number of cases          | Number of controls       |                                    |                                       |                    |                                                                                                         |          |
| Inoue et al.<br>(1994) (24) | 1988–1991    | Hospital-<br>based (Aichi<br>Cancer<br>Center) | Cases: histologically<br>confirmed cases<br><br>Controls: first-visit<br>outpatients without<br>history of cancer | 420 men<br><br>248 women | 420 men<br><br>248 women | Current 1–29<br>cigarettes/day     | 1.0 (0.5–1.7)                         | 0.31               | Matched (1:1) for<br>sex, age ( $\pm 2$<br>years), time of<br>first hospital visit<br>( $\pm 2$ months) |          |
|                             |              |                                                |                                                                                                                   |                          |                          | $\geq 30$                          | 0.7 (0.3–1.5)                         |                    |                                                                                                         |          |
|                             |              |                                                |                                                                                                                   |                          |                          | Ever $\leq 800$ cigarette<br>years | 0.9 (0.5–1.6)                         |                    |                                                                                                         |          |
|                             |              |                                                |                                                                                                                   |                          |                          | $> 800$                            | 0.7 (0.3–1.4)                         |                    |                                                                                                         |          |
|                             |              |                                                |                                                                                                                   |                          |                          | Men                                |                                       |                    |                                                                                                         |          |
|                             |              |                                                |                                                                                                                   |                          |                          | Never                              | 1.00                                  |                    |                                                                                                         |          |
|                             |              |                                                |                                                                                                                   |                          |                          | Past                               | 2.39 (1.57–3.64)                      |                    |                                                                                                         |          |
|                             |              |                                                |                                                                                                                   |                          |                          | $< 1$ year after<br>quitting       | 2.64 (1.17–5.19)                      |                    |                                                                                                         |          |
|                             |              |                                                |                                                                                                                   |                          |                          | 1–9                                | 2.51 (1.52–4.14)                      |                    |                                                                                                         |          |
|                             |              |                                                |                                                                                                                   |                          |                          | $\geq 10$                          | 2.27 (1.39–3.69)                      |                    |                                                                                                         |          |
|                             |              |                                                |                                                                                                                   |                          |                          | Current                            | 2.70 (1.80–4.06)                      |                    |                                                                                                         |          |
|                             |              |                                                |                                                                                                                   |                          |                          | 1–19 cigarettes/day                | 2.70 (1.61–4.54)                      |                    |                                                                                                         |          |
|                             |              |                                                |                                                                                                                   |                          |                          | $\geq 20$                          | 2.70 (1.77–4.14)                      |                    |                                                                                                         |          |
|                             |              |                                                |                                                                                                                   |                          |                          | Cardia                             |                                       |                    |                                                                                                         |          |
|                             |              |                                                |                                                                                                                   |                          |                          | Never                              | 1.00                                  |                    |                                                                                                         |          |
|                             |              |                                                |                                                                                                                   |                          |                          | Past                               | 4.12 (1.55–11.0)                      |                    |                                                                                                         |          |
|                             |              |                                                |                                                                                                                   |                          |                          | $< 1$ year after<br>quitting       | 6.85 (1.88–25.0)                      |                    |                                                                                                         |          |
|                             |              |                                                |                                                                                                                   |                          |                          | 1–9                                | 4.68 (1.60–13.7)                      |                    |                                                                                                         |          |
|                             |              |                                                |                                                                                                                   |                          |                          | $\geq 10$                          | 2.81 (0.92–8.59)                      |                    |                                                                                                         |          |
|                             |              |                                                |                                                                                                                   |                          |                          | Current                            | 4.71 (1.81–12.3)                      |                    |                                                                                                         |          |
|                             |              |                                                |                                                                                                                   |                          |                          | 1–19 cigarettes/day                | 5.94 (2.04–17.3)                      |                    |                                                                                                         |          |
|                             |              |                                                |                                                                                                                   |                          |                          | $\geq 20$                          | 4.28 (1.59–11.5)                      |                    |                                                                                                         |          |
|                             |              |                                                |                                                                                                                   |                          |                          | Middle                             |                                       |                    |                                                                                                         |          |
|                             |              |                                                |                                                                                                                   |                          |                          | Never                              | 1.00                                  |                    |                                                                                                         |          |
|                             |              |                                                |                                                                                                                   |                          |                          | Past                               | 1.61 (0.89–2.91)                      |                    |                                                                                                         |          |

|                           |                  |
|---------------------------|------------------|
| <1 year after<br>quitting | 3.63 (0.77–5.76) |
| 1–9                       | 1.41 (0.67–2.95) |
| ≥10                       | 1.70 (0.86–3.36) |
| Current                   | 1.93 (1.10–3.40) |
| 1–19 cigarettes/day       | 1.35 (0.62–2.97) |
| ≥20                       | 2.17 (1.21–3.90) |
| Antrum                    |                  |
| Never                     | 1.00             |
| Past                      | 2.74 (1.50–5.01) |
| <1 year after<br>quitting | 2.14 (0.73–6.05) |
| 1–9                       | 3.03 (1.52–6.05) |
| ≥10                       | 2.72 (1.38–5.36) |
| Current                   | 3.01 (1.68–5.42) |
| 1–19 cigarettes/day       | 2.97 (1.45–6.10) |
| ≥20                       | 3.01 (1.64–5.53) |
| Women                     |                  |
| Never                     | 1.00             |
| Ever smoker               | 1.18 (0.71–1.97) |
| Cardia                    |                  |
| Never                     | 1.00             |
| Ever smoker               | 1.28 (0.52–3.11) |
| Middle                    |                  |
| Never                     | 1.00             |
| Ever smoker               | 1.00 (0.48–2.09) |
| Antrum                    |                  |
| Never                     | 1.00             |
| Ever smoker               | 1.31 (0.66–2.60) |

---

*Continued*

Table 2. Continued

| References                   | Study period | Study subjects                                                                                              |                                                                  |                 |                             | Category         | Relative risk<br>(95%CI or <i>P</i> ) | <i>P</i> for trend | Confounding<br>variables<br>considered                                                                                                                         | Comments                                                                                                                                               |
|------------------------------|--------------|-------------------------------------------------------------------------------------------------------------|------------------------------------------------------------------|-----------------|-----------------------------|------------------|---------------------------------------|--------------------|----------------------------------------------------------------------------------------------------------------------------------------------------------------|--------------------------------------------------------------------------------------------------------------------------------------------------------|
|                              |              | Type and<br>source                                                                                          | Definition                                                       | Number of cases | Number of controls          |                  |                                       |                    |                                                                                                                                                                |                                                                                                                                                        |
| Murata et al.<br>(1996) (25) | 1984–1993    | Nested case-control (male participants in a gastric mass screening by the Chiba Cancer Association in 1984) | Case: confirmed by record linkage with the Chiba Cancer Registry | 246 men         | 493 men                     | Nonsmoker        | 1.0                                   | 0.2                | Matched (1:2) for sex, birth year ( $\pm 2$ years), the first digit of the address code                                                                        | Current smokers included those who had quit smoking within the past 2 years. Nonsmokers included past smokers who had quit smoking for 2 years or more |
|                              |              |                                                                                                             |                                                                  |                 | Current 1–10 cigarettes/day | 1.0              |                                       |                    |                                                                                                                                                                |                                                                                                                                                        |
|                              |              |                                                                                                             |                                                                  |                 | 11–20                       | 1.1              |                                       |                    |                                                                                                                                                                |                                                                                                                                                        |
|                              |              |                                                                                                             |                                                                  |                 | $\geq 21$                   | 1.1              |                                       |                    |                                                                                                                                                                |                                                                                                                                                        |
| Huang et al.<br>(1999) (26)  | 1990–1995    | Hospital-based (Aichi Cancer Center)                                                                        | Cases: histologically confirmed cases                            | 595 men         | 7892 men                    | Men              |                                       |                    | Adjusted for age, sex, drinking habits                                                                                                                         |                                                                                                                                                        |
|                              |              | HERPACC study                                                                                               | Controls: first-visit outpatients without history of cancer      |                 |                             | Never            | 1.0                                   |                    |                                                                                                                                                                |                                                                                                                                                        |
|                              |              |                                                                                                             |                                                                  |                 |                             | Current          | 2.22 (1.68–2.93)                      |                    |                                                                                                                                                                |                                                                                                                                                        |
| Inoue et al.<br>(1999) (27)  | 1988–1995    | Hospital-based (Aichi Cancer Center)<br><br>HERPACC study                                                   | Cases: histologically confirmed cases                            | 651 men         | 12041 men                   | Men              |                                       | <0.001             | Adjusted for age, year and season at first hospital visit, family history of gastric cancer, habitual alcohol drinking, preference of salty food, fruit intake |                                                                                                                                                        |
|                              |              |                                                                                                             | Controls: first-visit outpatients without history of cancer      | 344 women       | 31805 women                 | Never            | 1.0                                   |                    |                                                                                                                                                                |                                                                                                                                                        |
|                              |              |                                                                                                             |                                                                  |                 |                             | Former           | 1.70 (1.28–2.26)                      |                    |                                                                                                                                                                |                                                                                                                                                        |
|                              |              |                                                                                                             |                                                                  |                 | Current                     | 2.50 (1.91–3.27) |                                       |                    |                                                                                                                                                                |                                                                                                                                                        |
|                              |              |                                                                                                             |                                                                  |                 | <20 cigarettes/day          | 2.50 (1.90–3.49) |                                       |                    |                                                                                                                                                                |                                                                                                                                                        |
|                              |              |                                                                                                             |                                                                  |                 | $\geq 20$                   | 2.50 (1.84–3.40) |                                       |                    |                                                                                                                                                                |                                                                                                                                                        |
|                              |              |                                                                                                             |                                                                  |                 | Start $\geq 20$ years old   | 2.50 (1.90–3.29) |                                       |                    |                                                                                                                                                                |                                                                                                                                                        |
|                              |              |                                                                                                             |                                                                  |                 | <20                         | 2.51 (1.80–3.49) |                                       |                    |                                                                                                                                                                |                                                                                                                                                        |
|                              |              |                                                                                                             |                                                                  |                 | Differentiated              |                  |                                       |                    |                                                                                                                                                                |                                                                                                                                                        |
|                              |              |                                                                                                             |                                                                  |                 | Never                       | 1.0              |                                       |                    |                                                                                                                                                                |                                                                                                                                                        |
|                              |              |                                                                                                             |                                                                  |                 | Former                      | 1.93 (1.30–2.86) |                                       |                    |                                                                                                                                                                |                                                                                                                                                        |
|                              |              |                                                                                                             |                                                                  |                 | Current                     | 2.73 (1.86–3.99) |                                       |                    |                                                                                                                                                                |                                                                                                                                                        |
|                              |              |                                                                                                             |                                                                  |                 | <20 cigarettes/day          | 2.72 (1.83–4.03) |                                       |                    |                                                                                                                                                                |                                                                                                                                                        |
|                              |              |                                                                                                             |                                                                  |                 | $\geq 20$                   | 2.76 (1.78–4.28) |                                       |                    |                                                                                                                                                                |                                                                                                                                                        |

|                           |                  |         |
|---------------------------|------------------|---------|
| Start $\geq 20$ years old | 2.71 (1.84–3.99) |         |
| <20                       | 2.80 (1.75–4.48) |         |
| Non-differentiated        |                  |         |
| Never                     | 1.0              |         |
| Former                    | 1.50 (0.99–2.26) |         |
| Current                   | 2.32 (1.59–3.38) |         |
| <20 cigarettes/day        | 2.33 (1.58–3.45) | < 0.001 |
| $\geq 20$                 | 2.29 (1.50–3.50) |         |
| Start $\geq 20$ years old | 2.33 (1.58–3.43) |         |
| <20                       | 2.29 (1.45–3.61) |         |
| Women                     |                  |         |
| Never                     | 1.0              |         |
| Former                    | 1.37 (0.80–2.34) |         |
| Current                   | 1.74 (1.28–2.36) |         |
| <20 cigarettes/day        | 1.73 (1.25–2.38) | <0.05   |
| $\geq 20$                 | 1.94 (0.85–4.47) |         |
| Start $\geq 20$ years old | 1.77 (1.29–2.43) |         |
| <20                       | 1.36 (0.49–3.74) |         |
| Differentiated            |                  |         |
| Never                     | 1.0              |         |
| Former                    | 1.23 (0.49–3.09) |         |
| Current                   | 1.60 (0.91–2.81) |         |
| <20 cigarettes/day        | 1.55 (0.86–2.81) | NS      |
| $\geq 20$                 | 2.22 (0.53–9.36) |         |
| Start $\geq 20$ years old | 1.71 (0.98–3.00) |         |
| <20                       | –                |         |
| Non-differentiated        |                  |         |
| Never                     | 1.0              |         |
| Former                    | 1.42 (0.74–2.72) |         |
| Current                   | 1.76 (1.21–2.54) |         |
| <20 cigarettes/day        | 1.76 (1.19–2.58) | <0.05   |
| $\geq 20$                 | 1.87 (0.68–5.14) |         |
| Start $\geq 20$ years old | 1.76 (1.20–2.58) |         |
| <20                       | 1.75 (0.63–4.86) |         |

*Continued*

**Table 2.** *Continued*

| References                    | Study period | Study subjects                                                                |                                                                                                                                                                                 |                          |                          | Category                      | Relative risk<br>(95%CI or <i>P</i> ) | <i>P</i> for trend | Confounding<br>variables<br>considered                                 | Comments |
|-------------------------------|--------------|-------------------------------------------------------------------------------|---------------------------------------------------------------------------------------------------------------------------------------------------------------------------------|--------------------------|--------------------------|-------------------------------|---------------------------------------|--------------------|------------------------------------------------------------------------|----------|
|                               |              | Type and<br>source                                                            | Definition                                                                                                                                                                      | Number of cases          | Number of controls       |                               |                                       |                    |                                                                        |          |
| Kikuchi et al.<br>(2002) (28) | 1993–1995    | Hospital-<br>based (nine<br>hospital in the<br>Tokyo<br>Metropolitan<br>Area) | Cases: newly<br>hospitalized with<br>histologically<br>confirmed cases<br><br>Controls: recruited<br>from several health<br>check programs in a<br>hospital in the same<br>area | 494 men<br><br>224 women | 448 men<br><br>435 women | Men                           |                                       |                    | Adjusted for age,<br><i>Helicobacter<br/>pylori</i> status,<br>alcohol |          |
|                               |              |                                                                               |                                                                                                                                                                                 |                          |                          | Never                         | 1.0                                   |                    |                                                                        |          |
|                               |              |                                                                               |                                                                                                                                                                                 |                          |                          | Ever 1–399<br>cigarette-years | 1.21 (0.76–1.92)                      |                    |                                                                        |          |
|                               |              |                                                                               |                                                                                                                                                                                 |                          |                          | 400–799                       | 2.00 (1.31–3.05)                      |                    |                                                                        |          |
|                               |              |                                                                               |                                                                                                                                                                                 |                          |                          | ≥800                          | 2.63 (1.69–4.10)                      | < 0.001            |                                                                        |          |
|                               |              |                                                                               |                                                                                                                                                                                 |                          |                          | Intestinal type               |                                       |                    |                                                                        |          |
|                               |              |                                                                               |                                                                                                                                                                                 |                          |                          | Never                         | 1.0                                   |                    |                                                                        |          |
|                               |              |                                                                               |                                                                                                                                                                                 |                          |                          | Ever 1–399<br>cigarette-years | 1.25 (0.73–2.15)                      |                    |                                                                        |          |
|                               |              |                                                                               |                                                                                                                                                                                 |                          |                          | 400–799                       | 2.13 (1.31–3.44)                      |                    |                                                                        |          |
|                               |              |                                                                               |                                                                                                                                                                                 |                          |                          | ≥800                          | 2.70 (1.65–4.42)                      | <0.01              |                                                                        |          |
|                               |              |                                                                               |                                                                                                                                                                                 |                          |                          | Diffuse type                  |                                       |                    |                                                                        |          |
|                               |              |                                                                               |                                                                                                                                                                                 |                          |                          | Never                         | 1.0                                   |                    |                                                                        |          |
|                               |              |                                                                               |                                                                                                                                                                                 |                          |                          | Ever 1–399<br>cigarette-years | 1.06 (0.57–1.97)                      |                    |                                                                        |          |
|                               |              |                                                                               |                                                                                                                                                                                 |                          |                          | 400–799                       | 1.63 (0.93–2.87)                      |                    |                                                                        |          |
|                               |              |                                                                               |                                                                                                                                                                                 |                          |                          | ≥800                          | 2.44 (1.37–4.33)                      | <0.01              |                                                                        |          |
|                               |              |                                                                               |                                                                                                                                                                                 |                          |                          | Early                         |                                       |                    |                                                                        |          |
|                               |              |                                                                               |                                                                                                                                                                                 |                          |                          | Never                         | 1.0                                   |                    |                                                                        |          |
|                               |              |                                                                               |                                                                                                                                                                                 |                          |                          | Ever 1–399<br>cigarette-years | 1.42 (0.81–2.47)                      |                    |                                                                        |          |
|                               |              |                                                                               |                                                                                                                                                                                 |                          |                          | 400–799                       | 2.26 (1.37–3.75)                      |                    |                                                                        |          |
|                               |              |                                                                               |                                                                                                                                                                                 |                          |                          | ≥800                          | 2.83 (1.68–4.78)                      |                    |                                                                        |          |
|                               |              |                                                                               |                                                                                                                                                                                 |                          |                          | Advanced                      |                                       |                    |                                                                        |          |
|                               |              |                                                                               |                                                                                                                                                                                 |                          |                          | Never                         | 1.0                                   |                    |                                                                        |          |
|                               |              |                                                                               |                                                                                                                                                                                 |                          |                          | Ever 1–399<br>cigarette-years | 0.98 (0.54–1.78)                      |                    |                                                                        |          |
|                               |              |                                                                               |                                                                                                                                                                                 |                          |                          | 400–799                       | 1.71 (1.02–2.89)                      |                    |                                                                        |          |
|                               |              |                                                                               |                                                                                                                                                                                 |                          |                          | ≥800                          | 2.45 (1.45–4.15)                      | <0.01              |                                                                        |          |

|                               |                  |       |
|-------------------------------|------------------|-------|
| Proximal                      |                  |       |
| Never                         | 1.0              |       |
| Ever 1–399<br>cigarette-years | 1.15 (0.51–2.57) |       |
| 400–799                       | 2.11 (1.06–4.17) |       |
| ≥800                          | 2.83 (1.44–5.59) | <0.01 |
| Middle                        |                  |       |
| Never                         | 1.0              |       |
| Ever 1–399<br>cigarette-years | 0.87 (0.49–1.85) |       |
| 400–799                       | 1.22 (0.72–2.07) |       |
| ≥800                          | 2.10 (1.24–3.55) | 0.01  |
| Distal                        |                  |       |
| Never                         | 1.0              |       |
| Ever 1–399<br>cigarette-years | 1.95 (0.99–3.84) |       |
| 400–799                       | 3.20 (1.75–5.86) |       |
| ≥800                          | 3.47 (1.86–6.45) | <0.01 |
| Women                         |                  |       |
| Never                         | 1.0              |       |
| Ever 1–399<br>cigarette-years | 0.70 (0.40–1.22) |       |
| ≥400                          | 3.61 (1.57–8.30) | 0.016 |
| Intestinal type               |                  |       |
| Ever 1–399<br>cigarette-years | 0.76 (0.33–1.77) |       |
| ≥400                          | 2.50 (0.83–7.56) | 0.20  |
| Diffuse type                  |                  |       |
| Ever 1–399<br>cigarette-years | 0.69 (0.35–1.35) |       |
| ≥400                          | 2.89 (1.10–7.61) | 0.04  |
| Early                         |                  |       |
| Ever 1–399<br>cigarette-years | 0.66 (0.31–1.40) |       |
| ≥400                          | 2.57 (0.95–6.95) | 0.08  |
| Advanced                      |                  |       |
| Ever 1–399<br>cigarette-years | 0.78 (0.38–1.60) |       |

---

*Continued*

**Table 2.** *Continued*

| References                  | Study period | Study subjects                                                         |                                                                                                                   |                               |                                | Category                      | Relative risk<br>(95%CI or <i>P</i> ) | <i>P</i> for trend | Confounding<br>variables<br>considered                                                                                                   | Comments |
|-----------------------------|--------------|------------------------------------------------------------------------|-------------------------------------------------------------------------------------------------------------------|-------------------------------|--------------------------------|-------------------------------|---------------------------------------|--------------------|------------------------------------------------------------------------------------------------------------------------------------------|----------|
|                             |              | Type and<br>source                                                     | Definition                                                                                                        | Number of cases               | Number of controls             |                               |                                       |                    |                                                                                                                                          |          |
| Inoue et al.<br>(2002) (29) | 1988–1998    | Hospital-<br>based (Aichi<br>Cancer<br>Center)<br><br>HERPACC<br>study | Cases: histologically<br>confirmed cases<br><br>Controls: first-visit<br>outpatients without<br>history of cancer | 365 women<br>(postmenopausal) | 1825 women<br>(postmenopausal) | ≥400                          | 2.65 (0.95–7.35)                      | 0.12               | Adjusted for age,<br>year and season<br>of interview,<br>family history of<br>gastric cancer,<br>raw vegetable and<br>cooked fish intake |          |
|                             |              |                                                                        |                                                                                                                   |                               |                                | Proximal                      |                                       |                    |                                                                                                                                          |          |
|                             |              |                                                                        |                                                                                                                   |                               |                                | Ever 1–399<br>cigarette-years | 0.34 (0.76–1.49)                      |                    |                                                                                                                                          |          |
|                             |              |                                                                        |                                                                                                                   |                               |                                | ≥400                          | 3.43 (0.94–12.47)                     | 0.05               |                                                                                                                                          |          |
|                             |              |                                                                        |                                                                                                                   |                               |                                | Middle                        |                                       |                    |                                                                                                                                          |          |
|                             |              |                                                                        |                                                                                                                   |                               |                                | Ever 1–399<br>cigarette-years | 0.98 (0.51–1.87)                      |                    |                                                                                                                                          |          |
|                             |              |                                                                        |                                                                                                                   |                               |                                | ≥400                          | 2.25 (0.81–6.25)                      | 0.29               |                                                                                                                                          |          |
|                             |              |                                                                        |                                                                                                                   |                               |                                | Distal                        |                                       |                    |                                                                                                                                          |          |
|                             |              |                                                                        |                                                                                                                   |                               |                                | Ever 1–399<br>cigarette-years | 0.50 (0.16–1.51)                      |                    |                                                                                                                                          |          |
|                             |              |                                                                        |                                                                                                                   |                               |                                | ≥400                          | 2.90 (0.97–8.69)                      | 0.06               |                                                                                                                                          |          |
|                             |              |                                                                        |                                                                                                                   |                               |                                | Never                         | 1.0                                   |                    |                                                                                                                                          |          |
|                             |              |                                                                        |                                                                                                                   |                               |                                | Past                          | 1.55 (0.92–2.61)                      |                    |                                                                                                                                          |          |
|                             |              |                                                                        |                                                                                                                   |                               |                                | Current                       | 2.07 (1.46–2.93)                      |                    |                                                                                                                                          |          |
|                             |              |                                                                        |                                                                                                                   |                               |                                | <20 cigarettes/day            | 2.09 (1.44–3.04)                      |                    |                                                                                                                                          |          |
|                             |              |                                                                        |                                                                                                                   |                               |                                | ≥20                           | 2.00 (0.82–4.89)                      |                    |                                                                                                                                          |          |
|                             |              |                                                                        |                                                                                                                   |                               |                                | Upper third                   |                                       |                    |                                                                                                                                          |          |
|                             |              |                                                                        |                                                                                                                   |                               |                                | Past                          | 2.26 (0.93–5.49)                      |                    |                                                                                                                                          |          |
|                             |              |                                                                        |                                                                                                                   |                               |                                | Current                       | 1.50 (0.70–3.24)                      |                    |                                                                                                                                          |          |
|                             |              |                                                                        |                                                                                                                   |                               |                                | <20 cigarettes/day            | 1.54 (0.68–3.48)                      |                    |                                                                                                                                          |          |
|                             |              |                                                                        |                                                                                                                   |                               |                                | ≥20                           | 1.36 (0.18–10.5)                      |                    |                                                                                                                                          |          |
|                             |              |                                                                        |                                                                                                                   |                               |                                | Middle third                  |                                       |                    |                                                                                                                                          |          |
|                             |              |                                                                        |                                                                                                                   |                               |                                | Past                          | 1.26 (0.56–2.84)                      |                    |                                                                                                                                          |          |

|                    |                  |
|--------------------|------------------|
| Current            | 2.44 (1.53–3.89) |
| <20 cigarettes/day | 2.54 (1.55–4.14) |
| ≥20                | 2.00 (0.57–7.02) |
| Lower third        |                  |
| Past               | 1.63 (0.72–3.68) |
| Current            | 2.27 (1.32–3.91) |
| <20 cigarettes/day | 2.16 (1.20–3.87) |
| ≥20                | 3.23 (0.91–11.5) |
| Differentiated     |                  |
| Past               | 1.49 (0.66–3.37) |
| Current            | 2.29 (1.36–3.85) |
| <20 cigarettes/day | 2.22 (1.28–3.87) |
| ≥20                | 2.89 (0.82–10.2) |
| Nondifferentiated  |                  |
| Past               | 1.57 (0.84–2.93) |
| Current            | 1.94 (1.27–2.95) |
| <20 cigarettes/day | 2.01 (1.28–3.14) |
| ≥20                | 1.63 (0.54–4.94) |

|                              |           |                                                          |                      |           |            |               |                  |                                                                                                                                           |                   |
|------------------------------|-----------|----------------------------------------------------------|----------------------|-----------|------------|---------------|------------------|-------------------------------------------------------------------------------------------------------------------------------------------|-------------------|
| Minami et al.<br>(2003) (30) | 1997–2001 | Hospital-<br>based (Miyagi<br>Cancer Center<br>Hospital) | Cases: identified by | 429 men   | 1222 men   | Men and Women |                  | Adjusted for age,<br>sex, year of<br>survey, alcohol,<br>family history of<br>stomach cancer in<br>parents and<br>siblings,<br>occupation | * <i>P</i> < 0.05 |
|                              |           |                                                          | linkage with the     | 185 women | 1222 women | Never         | 1.0              |                                                                                                                                           |                   |
|                              |           |                                                          | hospital cancer      |           |            | Former        | 1.17 (0.86–1.58) |                                                                                                                                           |                   |
|                              |           |                                                          | registry             |           |            | Current       | 1.38 (1.06–1.80) |                                                                                                                                           |                   |
|                              |           |                                                          | Controls: first      |           |            |               |                  |                                                                                                                                           |                   |
|                              |           |                                                          | admitted patients    |           |            |               |                  |                                                                                                                                           |                   |
|                              |           |                                                          | without history of   |           |            |               |                  |                                                                                                                                           |                   |
|                              |           |                                                          | cancer               |           |            |               |                  |                                                                                                                                           |                   |
|                              |           |                                                          |                      |           |            | Ever          | 1.31 (1.02–1.67) |                                                                                                                                           |                   |

*Continued*

**Table 2.** *Continued*

| References                                | Study period | Study subjects                                  |                                                                                                                                                                                            |                 |                    | Category            | Relative risk<br>(95%CI or <i>P</i> ) | <i>P</i> for trend | Confounding<br>variables<br>considered                                                                                                                              | Comments |  |
|-------------------------------------------|--------------|-------------------------------------------------|--------------------------------------------------------------------------------------------------------------------------------------------------------------------------------------------|-----------------|--------------------|---------------------|---------------------------------------|--------------------|---------------------------------------------------------------------------------------------------------------------------------------------------------------------|----------|--|
|                                           |              | Type and<br>source                              | Definition                                                                                                                                                                                 | Number of cases | Number of controls |                     |                                       |                    |                                                                                                                                                                     |          |  |
| Machida-<br>Montani et al.<br>(2004) (31) | 1998–2002    | Hospital-based<br>(four hospitals<br>in Nagano) | Cases: non-cardia<br>gastric cancer with<br>histologic<br>confirmation<br><br>Controls: participants<br>of a health check-up<br>program during the<br>same period in the<br>same hospitals | 122 cases       | 235 controls       | Men                 |                                       |                    | Adjusted for age,<br>year of survey,<br>alcohol, family<br>history of stomach<br>cancer in parents<br>and siblings,<br>occupation                                   |          |  |
|                                           |              |                                                 |                                                                                                                                                                                            |                 |                    | Never               | 1.0                                   |                    |                                                                                                                                                                     |          |  |
|                                           |              |                                                 |                                                                                                                                                                                            |                 |                    | Former              | 1.49 (1.06–2.09)                      |                    |                                                                                                                                                                     |          |  |
|                                           |              |                                                 |                                                                                                                                                                                            |                 |                    |                     |                                       |                    |                                                                                                                                                                     |          |  |
|                                           |              |                                                 |                                                                                                                                                                                            |                 |                    | Current             | 1.71 (1.25–2.36)                      |                    |                                                                                                                                                                     |          |  |
|                                           |              |                                                 |                                                                                                                                                                                            |                 |                    | Ever                | 1.62 (1.20–2.19)                      |                    |                                                                                                                                                                     |          |  |
|                                           |              |                                                 |                                                                                                                                                                                            |                 |                    | 1–10 cigarettes/day | 1.34                                  |                    |                                                                                                                                                                     |          |  |
|                                           |              |                                                 |                                                                                                                                                                                            |                 |                    | 11–20               | 1.70*                                 |                    |                                                                                                                                                                     |          |  |
|                                           |              |                                                 |                                                                                                                                                                                            |                 |                    | ≥21                 | 1.62*                                 | 0.0026             |                                                                                                                                                                     |          |  |
|                                           |              |                                                 |                                                                                                                                                                                            |                 |                    | Duration ≤29 years  | 1.28                                  |                    |                                                                                                                                                                     |          |  |
|                                           |              |                                                 |                                                                                                                                                                                            |                 |                    | 30–49               | 1.64*                                 |                    |                                                                                                                                                                     |          |  |
|                                           |              |                                                 |                                                                                                                                                                                            |                 |                    | ≥50                 | 1.90*                                 |                    |                                                                                                                                                                     |          |  |
|                                           |              |                                                 |                                                                                                                                                                                            |                 |                    | Women               |                                       |                    |                                                                                                                                                                     |          |  |
|                                           |              |                                                 |                                                                                                                                                                                            |                 |                    | Never               | 1.0                                   |                    |                                                                                                                                                                     |          |  |
|                                           |              |                                                 |                                                                                                                                                                                            |                 |                    | Former              | 0.41 (0.10–1.75)                      |                    |                                                                                                                                                                     |          |  |
|                                           |              |                                                 |                                                                                                                                                                                            |                 |                    | Current             | 0.72 (0.38–1.37)                      |                    |                                                                                                                                                                     |          |  |
|                                           |              |                                                 |                                                                                                                                                                                            |                 |                    | Ever                | 0.65 (0.36–1.18)                      |                    |                                                                                                                                                                     |          |  |
|                                           |              |                                                 |                                                                                                                                                                                            |                 |                    | 1–10 cigarettes/day | 0.21*                                 |                    |                                                                                                                                                                     |          |  |
|                                           |              |                                                 |                                                                                                                                                                                            |                 |                    | 11–20               | 0.66                                  |                    |                                                                                                                                                                     |          |  |
|                                           |              |                                                 |                                                                                                                                                                                            |                 |                    | ≥21                 | 1.07                                  | 0.1862             |                                                                                                                                                                     |          |  |
|                                           |              |                                                 |                                                                                                                                                                                            |                 |                    | Duration ≤29 years  | 0.33                                  |                    |                                                                                                                                                                     |          |  |
|                                           |              |                                                 |                                                                                                                                                                                            |                 |                    | 30–49               | 0.59                                  |                    |                                                                                                                                                                     |          |  |
|                                           |              |                                                 |                                                                                                                                                                                            |                 |                    | ≥50                 | 1.74                                  |                    |                                                                                                                                                                     |          |  |
|                                           |              |                                                 |                                                                                                                                                                                            |                 |                    | Men and Women       |                                       |                    |                                                                                                                                                                     |          |  |
|                                           |              |                                                 |                                                                                                                                                                                            |                 |                    | Never               | 1.0                                   |                    |                                                                                                                                                                     |          |  |
|                                           |              |                                                 |                                                                                                                                                                                            |                 |                    |                     |                                       |                    |                                                                                                                                                                     |          |  |
|                                           |              |                                                 |                                                                                                                                                                                            |                 |                    | Past                | 2.8 (1.3–6.3)                         |                    |                                                                                                                                                                     |          |  |
|                                           |              |                                                 |                                                                                                                                                                                            |                 |                    | Current             | 2.8 (1.2–6.5)                         | 0.03               | Adjusted for <i>H. pylori</i> infection,<br>JA membership,<br>family history of<br>gastric cancer,<br>total vegetable<br>intake, total fruit<br>intake, salt intake |          |  |

|                                        |                 |                                                                                                                       |
|----------------------------------------|-----------------|-----------------------------------------------------------------------------------------------------------------------|
| <i>H. pylori</i> (–) and never smoking | 1.0             | Adjusted for JA membership, family history of gastric cancer, total vegetable intake, total fruit intake, salt intake |
| <i>H. pylori</i> (–) and smoking       | 1.9 (0.4–8.8)   |                                                                                                                       |
| <i>H. pylori</i> (+) and never smoking | 6.4 (2.1–19.7)  |                                                                                                                       |
| <i>H. pylori</i> (+) and smoking       | 19.0 (5.4–67.2) |                                                                                                                       |
| (Interaction term = 0.52)              |                 |                                                                                                                       |
| <i>H. pylori</i> (+) and never smoking | 1.0             |                                                                                                                       |
| <i>H. pylori</i> (+) and smoking       | 3.0 (1.4–6.6)   |                                                                                                                       |

---
